# Supplementary material for: Hyaluronic Acid Scaffolds for Loco-Regional Therapy in Nervous System Related Disorders
Source: MDPI journal article supplement (doi:10.3390/ijms232012174), 2022-10-12
Supplement: s1 [file s1]

**Table S1.** Devices development for Glioblastoma application

| Device                    | Matrix composition                                                                        | Proposed mechanism                                                                                       | Study model                                                                                               | Major Findings                                                                                                                                                     | Reference                                                   |
|---------------------------|-------------------------------------------------------------------------------------------|----------------------------------------------------------------------------------------------------------|-----------------------------------------------------------------------------------------------------------|--------------------------------------------------------------------------------------------------------------------------------------------------------------------|-------------------------------------------------------------|
|                           |                                                                                           |                                                                                                          | (In vitro, in vivo, ex vivo)                                                                              |                                                                                                                                                                    |                                                             |
| <b>Hydrogel system</b>    | HA-functionalized Methacrylate gelatin/poly(ethylene glycol) (PEG)4A                      | Mimic the microenvironment matrix for GBM cells                                                          | 2-3D cultures, patient-derived GBM cells                                                                  | HA-dose-dependent alterations in GBM malignancy-associated markers. HA can lead to a specific interaction in EGFR+ cells via CD44.                                 | [Pedron et al., 2013]<br>10.1016/j.biomaterials.2013.06.024 |
| <b>Composite hydrogel</b> | Collagen-Hyaluronan                                                                       | Mimic the microenvironment matrix for GBM cells                                                          | 3D culture, patient-derived GBM cells                                                                     | Cell morphology, spreading and migration were influenced by collagen type and HA concentration.                                                                    | [Rao et al., 2013]<br>10.1021/am402097j                     |
| <b>Hydrogels</b>          | HA-Gelatin thiol-reactive PEG diacrylate (PEGDA)/PEG divinyl sulfone (PEGDVS) crosslinked | Mimic the microenvironment matrix for GBM cells and develop a better analytical analysis <i>in vitro</i> | Single-cells, 3D culture, U118, U87R cell lines                                                           | Potential to identify differences in the invasive behaviour of the cell and analyse the cellular response to biophysical signals in the extracellular environment. | [Heffernan et al., 2014]<br>10.1007/s10439-014-1223-1       |
| <b>Composite scaffold</b> | Chitosan-HA scaffold                                                                      | Mimic the microenvironment matrix for GBM cells                                                          | Single-cells, 2D culture, GSC GBM6 cell lines                                                             | Better cellular morphology, growth patterns, and malignant behaviour than adherent monolayers.                                                                     | [Wang et al., 2016]<br>10.1002/adhm.201600684               |
| <b>Micelles</b>           | HA-Modified Micelles lauroyl-gemcitabine (Gem-C12) and honokiol (HNK) encapsulated        | Nanocarriers for targeting drug delivery of combined chemotherapeutics                                   | Single-cells, 3D culture, U87 cell line<br><br>Subcutaneous glioma-bearing mice; orthotopic xenograft GBM | Deep penetration into spheroids, endocytosis mediated by the CD44 receptor, and increased cytotoxicity of the combined treatment. Enhanced animal survival rate.   | [Liu et al., 2018]<br>10.1021/acs.molpharmaceut.7b01035     |

|                                 |                                                                                                                                     |                                                            |                                                                                         |                                                                                                                                                                                                                                     |                                                              |
|---------------------------------|-------------------------------------------------------------------------------------------------------------------------------------|------------------------------------------------------------|-----------------------------------------------------------------------------------------|-------------------------------------------------------------------------------------------------------------------------------------------------------------------------------------------------------------------------------------|--------------------------------------------------------------|
| <b>Thermosensitive hydrogel</b> | Doxorubicin/paclitaxel embedded Pluronic F127/HA hydrogel system (freeze-dried micelles)                                            | Intratumoral administration of combined chemotherapy       | Degradation rate, drug release<br><br>Injection force determination, Chicken meat model | Controlled release of both chemotherapeutics and great stability. The formulation also showed easy injectability.                                                                                                                   | [Rezazadeh et al., 2018]<br>10.4103/1735-5362.228918         |
| <b>Hydrogel</b>                 | HA/ poly(ethylene glycol) (PEG)                                                                                                     | Mimic the microenvironment matrix for GBM cells            | 3D culture, patient-derived GBM cells                                                   | Cell viability and proliferation rates are as good as or better than standard glioma spheres culture. Compatible results for use in molecular and cellular analyses.                                                                | [Xiao et al., 2018]<br>10.3791/58176                         |
| <b>Aerogel sponge</b>           | Stromal cell derived factor-1 $\alpha$ loaded in Silk fibroin-HA-Heparin                                                            | Chemoattractant loaded scaffold trap for brain tumor cells | Single-cells, NIH3T3 cell line                                                          | Cytocompatible material with adequate mean pore diameter (60 $\mu$ m) and connectivity for welcoming cells. Texture similar to brain tissue (6–13 kPa Young's Modulus), slower biodegradation and 93% retention of SDF-1 $\alpha$ . | [Najberg et al., 2019]<br>10.1016/j.carbpol.2020.116107      |
| <b>Nanofibers scaffold</b>      | Polycaprolactone (PCL) /gelatin (Gel) / hyaluronic acid (HA)                                                                        | Mimic GBM extracellular matrix                             | Single-cells, U251 cell line                                                            | The topography and surface chemistry (hydrophilic) played an important role in the biomechanical, proliferative, and morphological properties of the cells.                                                                         | [Unal et al., 2020]<br>10.3390/ma13112661                    |
| <b>Drug loaded Hydrogel</b>     | Crosslinked-HA-adipic acid dihydrazide (ADH) loaded with human urotensin (hUII) peptide and doxorubicin (DOX) or temozolomide (TMZ) | Chemoattractant matrix to trap and eradicate GBM cells     | Single-cells, U87MG cell line                                                           | Cell migration and invasion into the hydrogel in response to the hUII. Significant cytotoxicity of DOX-loaded hydrogels for U87MG cells.                                                                                            | [Kasapidou et al., 2021]<br>10.1039/d1sm01003d               |
| <b>Drug-loaded hydrogel</b>     | Peptide functionalized HA (HACF) cross-linked by                                                                                    | Drug delivery reservoir for resection cavity               | Single-cells, patient-derived GBM cells                                                 | Biocompatible, adaptable, and adjustable to local tissue stiffness. 45% improvement in patient survival.                                                                                                                            | [Parkins et al., 2021]<br>10.1016/j.biomaterials.2021.120919 |

|                               |                                                                                                                                                 |                                      |                                                                                                                   |                                                                                                                                                               |                                                       |
|-------------------------------|-------------------------------------------------------------------------------------------------------------------------------------------------|--------------------------------------|-------------------------------------------------------------------------------------------------------------------|---------------------------------------------------------------------------------------------------------------------------------------------------------------|-------------------------------------------------------|
|                               | cucurbit[8]uril (CB[8])                                                                                                                         |                                      | Patient-derived xenograft (PDX) rats                                                                              |                                                                                                                                                               |                                                       |
| <b>Hydrogel</b>               | Methacryloyl-modified HA (HAMA)                                                                                                                 | Tissue engineering application       | -                                                                                                                 | Suitable structure, porosity, and stiffness for tissue engineering purposes. Also, it showed to be resistant to collagenase biodegradation.                   | [Velasco-Rodriguez et al., 2021] 10.3390/ijms22136758 |
| <b>Composite scaffold</b>     | HA/gelatin (Gel) modified bacterial cellulose (BC)                                                                                              | Mimic GBM extracellular matrix       | 3D culture, U251 cell line                                                                                        | Good cell vitality, forming multi-layers and cell clusters in the scaffolds.                                                                                  | [Unal et al., 2021] 10.1007/s10570-020-03528-5        |
| <b>Drug loaded Nanogel</b>    | Lactoferrin (Lf)/phenylboronic acid (PBA)-functionalized HA nanogels crosslinked with disulfide-bond and doxorubicin hydrochloride (DOX)-loaded | Drug delivery and dual-targeting GBM | Single-cells and coculture, G422, bEnd.3 cell lines<br><br>SD rats - pharmacokinetics, ICR mice - biodistribution | Controlled release of the drug, effective BBB penetration, and precise glioma dual-targeting (PBA and HA), presenting strong cytotoxicity against G422 cells. | [Zhang et al., 2021] 10.1016/j.cjche.2021.08.029      |
| <b>Polymer-drug conjugate</b> | HA-Hydrazone-DOX                                                                                                                                | GBM local treatment                  | 2-3D culture GL261, U87MG, B16F10 cell lines<br>GL261-bearing mice                                                | Increased tumor cell mortality and inhibition of the tumor growth. Bio-responsive linker was crucial for the observed bioperformance.                         | [Malfanti et al., 2022] 10.3390/pharmaceutics14010124 |

**Table S2.** Systems developed for CNS injuries application

| Device   | Matrix composition                                           | Proposed mechanism                                       | Porosity connectivity diameter      | Mechanical properties | Study model                                                                                                              | Major Findings                                                                                                                                                              | Reference                                       |
|----------|--------------------------------------------------------------|----------------------------------------------------------|-------------------------------------|-----------------------|--------------------------------------------------------------------------------------------------------------------------|-----------------------------------------------------------------------------------------------------------------------------------------------------------------------------|-------------------------------------------------|
|          |                                                              |                                                          |                                     |                       | (In vitro, in vivo, ex vivo)                                                                                             |                                                                                                                                                                             |                                                 |
| Hydrogel | HA –PDL hydrogel                                             | Scaffold material for the repair of defects brain tissue | Good connectivity and adherence     | -                     | <ul style="list-style-type: none"> <li>Human DRG cell line and NSCs</li> <li>3 months old Sprague Dawley rats</li> </ul> | After implantation, the polymer hydrogel rightly bridged the tissue defect, establishing a permissive interface with the host tissue to aid cell ingrowth and angiogenesis. | [Tian et al.2005]<br>10.1089/ten.2005.11.513    |
| Hydrogel | HA-arginine-glycine-aspartic acid (RGD)                      | Tissue engineering for brain regeneration                | -                                   | -                     | <ul style="list-style-type: none"> <li>Sprague-Dawley rats, cortex implantation</li> </ul>                               | HA-RGD hydrogel provided a structural, 3D continuity across the cortex and favoured reorganisation of local wound-repair cells, angiogenesis, and axonal growth.            | [Cui et al., 2006]<br>10.1007/s10856-006-0615-7 |
| Hydrogel | HA- Poly-D-lysine (PLL)/ nogo-66 receptor antibody (antiNgR) | Tissue engineering for nerve regeneration                | 10 to 100 µm interconnected network | -                     | <ul style="list-style-type: none"> <li>Sprague-Dawley rats, lateral hemisection of spinal cord</li> </ul>                | Inhibited the glial scar formation, support angiogenesis, and promote axonal extension.                                                                                     | [Wei et al., 2007]<br>10.1002/jbm.b.31689       |

|                                        |                                                                                                                                                                          |                                                                              |                                |                                 |                                                                                                                                      |                                                                                                                                                                                             |                                                     |
|----------------------------------------|--------------------------------------------------------------------------------------------------------------------------------------------------------------------------|------------------------------------------------------------------------------|--------------------------------|---------------------------------|--------------------------------------------------------------------------------------------------------------------------------------|---------------------------------------------------------------------------------------------------------------------------------------------------------------------------------------------|-----------------------------------------------------|
| <b>Sponge-like scaffold</b>            | Collagen type I and II/HA                                                                                                                                                | Neurogenic induction of cells seeded into a construct for brain regeneration | 80-200µm pore size(75% to 91%) | 1-6.3kPa Young modulus          | <ul style="list-style-type: none"> <li>• 2-3D, primary cell culture</li> </ul>                                                       | The scaffolds favour the differentiation of neural stem cells (NSCs) to neuronal cells in vitro.                                                                                            | [Wang et al., 2009]<br>10.1016/j.actbio.2009.03.033 |
| <b>Gel</b>                             | HA                                                                                                                                                                       | Matrix to reduce the marginal glial scarring                                 | 120 to 182 µm porosity         | Tensile strength: 4.1-6.3 N/mm2 | <ul style="list-style-type: none"> <li>• Sprague-Dawley rats</li> </ul>                                                              | Inhibited the glial scar formation by decreasing the thickness of gliosis and by reducing the number of the glial cells.                                                                    | [Lin et al., 2009]<br>10.1016/j.wneu.2009.09.004    |
| <b>Hydrogel-microspheres composite</b> | HA hydrogel / recombinant human brain-derived neurotrophic factor (BDNF) and vascular endothelial growth factor (VEGF)-poly(lactic-co-glycolic acid) microspheres loaded | Delivery system for NSCs                                                     | -                              | -                               | <ul style="list-style-type: none"> <li>• 2-3D, primary and single-cells cultures (Sprague-Dawley embryos forebrain cells)</li> </ul> | Stable releasing of the biofactors, promoting cells survival and growth. The soft property was suitable for CNS tissue. Biocompatible material, with great adhesion and cell proliferation. | [Wang et al., 2011]<br>10.1007/s11095-011-0452-3    |
| <b>Hydrogel</b>                        | HA-Modified methylcellulose                                                                                                                                              | NSPCs cells delivery vehicle                                                 | -                              | -                               | <ul style="list-style-type: none"> <li>• Rat NSPCs cells</li> </ul>                                                                  | Increased oligodendrocytes differentiation.                                                                                                                                                 | [Tam et al.,2012]<br>10.1039/c2jm33680d             |

|                                               |                                                     |                                                                             |                                |                                |                                                                                                                          |                                                                                                                                             |                                                          |
|-----------------------------------------------|-----------------------------------------------------|-----------------------------------------------------------------------------|--------------------------------|--------------------------------|--------------------------------------------------------------------------------------------------------------------------|---------------------------------------------------------------------------------------------------------------------------------------------|----------------------------------------------------------|
| <b>Electrospun nanofiber scaffold</b>         | HA-laminin-coated polycaprolactone (PCL) nanofibers | Neural tissue engineering for restore damaged tissue                        | Fiber diameters: 600–1200 nm   | -                              | <ul style="list-style-type: none"> <li>2-3D cell culture, eGFP neuronal SH-SY5Y cell line</li> </ul>                     | The aligned nanofibers permitted the guidance of neurite outgrowth.                                                                         | [McMurtrey, 2014]<br>10.1088/1741-2560/11/6/066009       |
| <b>Hydrogel</b>                               | HA-laminin/SDF-1 $\alpha$ loaded                    | Matrix to enhance neural transplant retention and migration delivery system | -                              | -                              | <ul style="list-style-type: none"> <li>3D, primary cell culture; NPSCs</li> <li>C57BL/6 mice, brain injection</li> </ul> | SDF-1 $\alpha$ signalling critically mediates NPSC transplant chemotactic migration, and the matrix increases NPSCs transplant retention.   | [Addington et al., 2017]<br>10.1016/j.matbio.2016.09.007 |
| <b>Microporous annealed particle hydrogel</b> | HA/K-peptide/Q-peptide/RGD                          | Matrix to promote brain tissue repair after stroke                          | -                              | -                              | <ul style="list-style-type: none"> <li>C57BL/6, stroke-induced</li> </ul>                                                | Reduced inflammatory response following stroke and increased peri-infarct vascularization.                                                  | [Nih et al., 2017]<br>10.1002/adma.201606471             |
| <b>Drug delivery scaffold</b>                 | SA and HA loaded device                             | Microenvironnement to embed stem cells in traumatic brain injury            | 200 $\mu$ m to tens of $\mu$ m | 0.1 kPa to 1 kPa Young Modulus | <ul style="list-style-type: none"> <li>HUC-MSCs</li> <li>SD rats</li> </ul>                                              | NSCs embedded in HA collagen biomaterials may promote reinnervation of damaged facial nerves, and artificial conduction of NSCs may provide | [Zhang et al., 2008]<br>10.1039/C7TB03213G               |

|                 |                                                                                                                                          |                                                             |                                                |                                |                                                                                                                                                                               |                                                                                                                                         |                                                     |
|-----------------|------------------------------------------------------------------------------------------------------------------------------------------|-------------------------------------------------------------|------------------------------------------------|--------------------------------|-------------------------------------------------------------------------------------------------------------------------------------------------------------------------------|-----------------------------------------------------------------------------------------------------------------------------------------|-----------------------------------------------------|
|                 |                                                                                                                                          |                                                             |                                                |                                |                                                                                                                                                                               | a potential treatment for peripheral nerve injury.                                                                                      |                                                     |
| <b>Hydrogel</b> | Glycidyl methacrylate-HA and Methacrylic anhydride-HA/Collagen I and laminin functionalized                                              | Engineered scaffold for tissue regeneration                 | 1 $\mu$ m pore size                            | 2-6kPa Young modulus           | <ul style="list-style-type: none"> <li>Schwann Cells and dorsal root ganglia (DRGs) cell lines</li> <li>Rat isolated tissue (sciatic nerve, brain and spinal cord)</li> </ul> | The material can be tuned to numerous soft tissues, and supported 3D axonal elongation of DRGs cultures.                                | [Spearman et al., 2020]<br>10.1002/jbm.a.36814.     |
| <b>Hydrogel</b> | HA-galactose oxidase (GalOx)-horseradish peroxidase (HRP)/bone mesenchymal stem cells (BMSC) and nerve growth factors (NGF) encapsulated | Implant or cell/drug delivery vehicle for tissue repair     | <100um pore size<br>loose and porous structure | Low elastic modulus<br><0.1kPa | <ul style="list-style-type: none"> <li>3D and single-cells models; BMSC cells</li> <li>Traumatic Brain Injury (TBI) model, C57BL/6 mice</li> </ul>                            | Good biocompatibility, stability, and biodegradability. Suitable for cell survival and proliferation, accelerated brain repair process. | [Wang et al., 2022]<br>10.1016/j.mtbio.2021.100201  |
| <b>Hydrogel</b> | HA-poly(N-isopropylacrylamide)                                                                                                           | Hybrid interpenetrating polymer network as cell carrier for | -                                              | 0.1kPa-8kPa Elastic modulus    | <ul style="list-style-type: none"> <li>Primary culture, NP cells</li> <li>Cartilage and intervertebral</li> </ul>                                                             | The matrix supported the cell viability and the phenotype expression of the encapsulated cells.                                         | [Guo et al., 2022]<br>10.1016/j.carbpol.2021.118828 |

|         |                                                 |                                              |   |   |                                                                                          |                                                                         |                                                     |
|---------|-------------------------------------------------|----------------------------------------------|---|---|------------------------------------------------------------------------------------------|-------------------------------------------------------------------------|-----------------------------------------------------|
|         |                                                 | nucleus pulposus (NP) repair                 |   |   | disc (IVD) organ culture                                                                 |                                                                         |                                                     |
| Nanogel | Iron oxide (Fe <sub>3</sub> O <sub>4</sub> )-HA | Theranostic material for Alzheimer's disease | - | - | <ul style="list-style-type: none"> <li>Single-cells culture, C8-D1A cell line</li> </ul> | Non-cytotoxic matrix. Efficient generation of negative contrast in MRI. | [Chen et al., 2022]<br>10.1016/j.arabjc.2022.103748 |

**Table S3.** Systems developed for PNS injuries application

| Device            | Matrix composition | Proposed mechanism                        | Porosity and connectivity         | Mechanical properties | Study model                                                                                                                   | Major Findings                                                                                                                                                                                                                           | Reference                                   |
|-------------------|--------------------|-------------------------------------------|-----------------------------------|-----------------------|-------------------------------------------------------------------------------------------------------------------------------|------------------------------------------------------------------------------------------------------------------------------------------------------------------------------------------------------------------------------------------|---------------------------------------------|
|                   |                    |                                           |                                   |                       | (In vitro, in vivo, ex vivo)                                                                                                  |                                                                                                                                                                                                                                          |                                             |
| Composite Conduit | HA / collagen      | Tissue engineering for nerve regeneration | Diameter 1.2 mm<br>Porosity 50 µm | -                     | <ul style="list-style-type: none"> <li>Rat SCs and neurospheres</li> <li>NSCs from neural cortex of SD rat embryos</li> </ul> | Cultured rat Schwann cells and neurospheres grow <i>in vitro</i> on new artificial HA-based nerve conduits. After 3 weeks of culture, conduits stayed circular with a round lumen, and cell-conduits conserved their original structure. | [Sakai et al., 2007] PMID: 17502696         |
| Composite conduit | HA / collagen      | Tissue engineering for nerve regeneration | 7 mm in length                    | -                     | <ul style="list-style-type: none"> <li>Normal adult New Zealand rabbits</li> </ul>                                            | NSC-embedded NT-3 HA-collagen composite scaffold, has shown that a number of nerve fibers were still unmyelinated. Degeneration and swelling of myelin lamellae were also visible.                                                       | [Zhang et al., 2008] 10.1186/1479-5876-6-67 |



|                          |                                     |                                                      |                                                |                               |                                                                                                                                           |                                                                                                                                                                                                                                                                                                                                                       |                                                                     |
|--------------------------|-------------------------------------|------------------------------------------------------|------------------------------------------------|-------------------------------|-------------------------------------------------------------------------------------------------------------------------------------------|-------------------------------------------------------------------------------------------------------------------------------------------------------------------------------------------------------------------------------------------------------------------------------------------------------------------------------------------------------|---------------------------------------------------------------------|
| <b>Composite Conduit</b> | HA-Silk Fibroin composite device    | Tissue engineering for nerve regeneration            | 79% of porosity                                | G'/G': 6 to 7 viscoelasticity | <ul style="list-style-type: none"> <li>• Rat Schwann cells (rSCs)</li> <li>• Male CD-1 mice</li> </ul>                                    | Both HA and HA-SF scaffolds were received by the host with no residual immune response at 8 weeks. The results show that SF incorporation improves the mechanical properties of the material and leads to promising biocompatible conduits for tubing strategies.                                                                                     | <p>[Gisbert et al., 2020]</p> <p>10.1016/j.ijbiomac.2020.01.149</p> |
| <b>Composite Conduit</b> | PDLLA/ $\beta$ -TCP/HA/CHS/NGF      | Polymer based scaffold for controlled release of NGF | Semi-permeable, pore size less than 10 $\mu$ m | 13-60 kPa Elastic modulus     | <ul style="list-style-type: none"> <li>• PDLLA/<math>\beta</math>-TCP nerve conduits</li> <li>• Sciatic nerve defect in SD rat</li> </ul> | Substantial enhancements in nerve regeneration were noticed after using the PDLLA/ $\beta$ -TCP/HA/CHS/NGF NGCs based on the different assessments. In vivo studies show that the PDLLA/ $\beta$ -TCP/HA/CHS/NGF sustained-release NGCs can significantly stimulate peripheral nerve regeneration, and the effect is comparable to that of autograft. | <p>[Yan et al., 2021]</p> <p>10.1007/s11595-021-2450-6</p>          |
| <b>Scaffold</b>          | PEDOT-doped HA NPs/ CS / Gel matrix | Tissue engineering for nerve regeneration            | 200– 300 $\mu$ m pore size<br>83-92% porosity  | 13-60 kPa Elastic modulus     | <ul style="list-style-type: none"> <li>• PC12 cell line</li> </ul>                                                                        | 8% PEDOT-HA/Cs/Gel scaffold had a higher cell adhesive efficiency and cell viability in comparison to the other conductive scaffolds. It also has shown a higher expression of synapse growth genes of GAP43 and SYP compared                                                                                                                         | <p>[Wang et al., 2017]</p> <p>10.1016/j.msec.2016.10.029</p>        |

|                 |                        |                                                                                 |                       |                               |                                                                                                                                     |                                                                                                                                                                                                                                                                                                                                                                                                                                                                      |                                                                                                          |
|-----------------|------------------------|---------------------------------------------------------------------------------|-----------------------|-------------------------------|-------------------------------------------------------------------------------------------------------------------------------------|----------------------------------------------------------------------------------------------------------------------------------------------------------------------------------------------------------------------------------------------------------------------------------------------------------------------------------------------------------------------------------------------------------------------------------------------------------------------|----------------------------------------------------------------------------------------------------------|
|                 |                        |                                                                                 |                       |                               |                                                                                                                                     | with the Cs/Gel control group.                                                                                                                                                                                                                                                                                                                                                                                                                                       |                                                                                                          |
| <b>Hydrogel</b> | HA-CS composite system | Hydrogels for nerve growth factor(NGF) sustained release and nerve regeneration | Porosity: 20 to 100μm | 2 to 4 kPa<br>Elastic modulus | <ul style="list-style-type: none"> <li>RSC96 rat SCs and PC12 cell lines</li> <li>Healthy adult Sprague-Dawley (SD) rats</li> </ul> | <ul style="list-style-type: none"> <li>The good mechanical, porous, and swelling properties play a synergistic role in enhancing nerve regeneration. The CS-HA/NGF hydrogels through a sustained release are favorable for promoting cell adhesion, spreading, and differentiation</li> <li>Chitosan and HA inhibited extraneural scarring, promoted nerve regeneration, raised the nerve conduction velocity and amended the recovery of nerve function.</li> </ul> | <p>[Xu et al., 2016]<br/>10.1177/0883911516662068</p> <p>[Li et al., 2018]<br/>10.3892/mmr.2018.8388</p> |

|                 |                    |                                                                              |                                       |                               |                                                                                                   |                                                                                                                                                                                                                                                                                                                                                                                      |                                                                |
|-----------------|--------------------|------------------------------------------------------------------------------|---------------------------------------|-------------------------------|---------------------------------------------------------------------------------------------------|--------------------------------------------------------------------------------------------------------------------------------------------------------------------------------------------------------------------------------------------------------------------------------------------------------------------------------------------------------------------------------------|----------------------------------------------------------------|
|                 |                    |                                                                              |                                       |                               |                                                                                                   | Combined together they enhance neural regeneration and repair.                                                                                                                                                                                                                                                                                                                       |                                                                |
| <b>Hydrogel</b> | HA-CS/NGF hydrogel | Injectable hydrogels aimed to sustained release of nerve growth factor (NGF) | Pore size 53-73µm<br>Porosity(82-87%) | 2.3-4.5kPa<br>Elastic modulus | <ul style="list-style-type: none"> <li>• BMSCs, RSC96 rat SCs cells and PC12 cell line</li> </ul> | <p>PDLLA/β-TCP nerve conduits formulated with CS-HA/NGF hydrogels improved the axon regeneration and myelination, contrasted to the PDLLA/β-TCP hollow nerve conduits and the autograft group. These findings imply that the CS-HA/NGF injectable hydrogel can successfully upgrade nerve regeneration, hence, it is a good candidate in the field of neural tissue engineering.</p> | <p>[Xu et al., 2022]<br/>10.1016/j.compositesb.2021.109509</p> |
